# Supplementary material for: Development of New Antiproliferative Compound against Human Tumor Cells from the Marine Microalgae Nannochloropsis gaditana by Applied Proteomics
Source: PubMed Central journal article supplement (PMC7795124; doi:10.3390/ijms22010096), 2020-12-24

From proteome to application by applied proteomics.  
Validation through a new antitumor compound.

**Authors:**

**Rafael Carrasco-Reinado<sup>1</sup>, Almudena Escobar-Niño<sup>1</sup>, Carlos Fajardo<sup>1</sup>; Ines M. Morano<sup>1</sup>, Francisco Amil-Ruiz<sup>2</sup>, Gonzalo Martinez-Rodríguez<sup>3</sup>, Carlos Fuentes-Almagro<sup>2</sup>, Victoria Capilla<sup>4</sup>, Lidia Tomás-Cobos<sup>4</sup>, Laura Soriano-Romaní<sup>4</sup>, Palmira Guarnizo<sup>5</sup>, Roberto A. Vallejo<sup>6</sup> and Francisco Javier Fernández-Acero<sup>1,\*</sup>**

**Supplementary Figure S1. Sequence alignment of the sequencing results.** CLUSTAL O(1.2.4) multiple sequence alignment of the sequencing results of the cloned prohibitin in pET28a. The sequencing results of the cloned prohibitin in pET28a were aligned with the nucleotide sequence XM\_005854224.1 (GenPept: XP\_005854286 /UniProt Accession: K8YWQ7) .

|                       |                                                                |      |
|-----------------------|----------------------------------------------------------------|------|
| PLM00134506+T7        | gtgccgcgcggcagccatagtctccagcaggaccgctgggagccttgcctaggtgtgacg   | 276  |
| PLM00134505+T7        | gtgccgcgcggcagccatagtctccagcaggaccgctgggagccttgcctaggtgtgacg   | 266  |
| XM_005854224.1:35-868 | -----ATGTCCTCCAGCAGGACCCGCTGGAGCCTTGTAGGTGTGACG                | 42   |
| PLM00134507+T7        | gtgccgcgcggcagccatagtctccagcaggaccgctgggagccttgcctaggtgtgacg   | 60   |
| PLM00134509+T7        | gtgccgcgcggcagccatagtctccagcaggaccgctgggagccttgcctaggtgtgacg   | 479  |
|                       | *****                                                          |      |
| PLM00134506+T7        | ggcatcctttacgcgggtacaatagtttttacacggtggagggtgggcaccgagctctg    | 336  |
| PLM00134505+T7        | ggcatcctttacgcgggtacaatagtttttacacggtggagggtgggcaccgagctctg    | 326  |
| XM_005854224.1:35-868 | GGCATCCTTTACGCGGGTACAATAGTTTTTACACGGTGGAGGGTGGGCACCGACTCTG     | 102  |
| PLM00134507+T7        | ggcatcctttacgcgggtacaatagtttttacacggtggagggtgggcaccgagctctg    | 120  |
| PLM00134509+T7        | ggcatcctttacgcgggtacaatagtttttacacggtggagggtgggcaccgagctctg    | 539  |
|                       | *****                                                          |      |
| PLM00134506+T7        | ttggtcaacagattaatcgggtgtgaaagaagaagtgtacatggagggaatgcattttatg  | 396  |
| PLM00134505+T7        | ttggtcaacagattaatcgggtgtgaaagaagaagtgtacatggagggaatgcattttatg  | 386  |
| XM_005854224.1:35-868 | TTGTTCAACAGATTAATCGGTGTGAAAGAAGAAGTGTACATGGAGGGAATGCATTTTATG   | 162  |
| PLM00134507+T7        | ttggtcaacagattaatcgggtgtgaaagaagaagtgtacatggagggaatgcattttatg  | 180  |
| PLM00134509+T7        | ttggtcaacagattaatcgggtgtgaaagaagaagtgtacatggagggaatgcattttatg  | 599  |
|                       | *****                                                          |      |
| PLM00134506+T7        | atccctggttcgacatgcccatcatttacgacatccgcccgaagcccggatgatccag     | 456  |
| PLM00134505+T7        | atccctggttcgacatgcccatcatttacgacatccgcccgaagcccggatgatccag     | 446  |
| XM_005854224.1:35-868 | ATTCCTGGTTGCACATGCCCATCATTTACGACATCCGCCCAAGCCCGGATGATCCAG      | 222  |
| PLM00134507+T7        | atccctggttcgacatgcccatcatttacgacatccgcccgaagcccggatgatccag     | 240  |
| PLM00134509+T7        | atccctggttcgacatgcccatcatttacgacatccgcccgaagcccggatgatccag     | 659  |
|                       | *****                                                          |      |
| PLM00134506+T7        | tccttgacaggaagcaaaagacatgcaaatgggtcaacatcaccatccgcttttctgctaag | 516  |
| PLM00134505+T7        | tccttgacaggaagcaaaagacatgcaaatgggtcaacatcaccatccgcttttctgctaag | 506  |
| XM_005854224.1:35-868 | TCCTTGACAGGAAGCAAAAGACATGCAAAATGGTCAACATCACCATCCGCGTTTTGTCTAAG | 282  |
| PLM00134507+T7        | tccttgacaggaagcaaaagacatgcaaatgggtcaacatcaccatccgcttttctgctaag | 300  |
| PLM00134509+T7        | tccttgacaggaagcaaaagacatgcaaatgggtcaacatcaccatccgcttttctgctaag | 719  |
|                       | *****                                                          |      |
| PLM00134506+T7        | cccgactcgggtcaactccgctggatctccgcaacctggggtcgcgactacgacgagcgt   | 576  |
| PLM00134505+T7        | cccgactcgggtcaactccgctggatctccgcaacctggggtcgcgactacgacgagcgt   | 566  |
| XM_005854224.1:35-868 | CCCGACTCGGCTCAACTCCGCTGGATCTCCGCACTTGGGTCGCGACTACGACGAGCGT     | 342  |
| PLM00134507+T7        | cccgactcgggtcaactccgctggatctccgcaacctggggtcgcgactacgacgagcgt   | 360  |
| PLM00134509+T7        | cccgactcgggtcaactccgctggatctccgcaacctggggtcgcgactacgacgagcgt   | 779  |
|                       | *****                                                          |      |
| PLM00134506+T7        | gtcctccttccatcgtcaacgaggtctccaagccgctgggtggccaagtacaacgcgcg    | 636  |
| PLM00134505+T7        | gtcctccttccatcgtcaacgaggtctccaagccgctgggtggccaagtacaacgcgcg    | 626  |
| XM_005854224.1:35-868 | GTCTCCTTCCATCGTCAACGAGGTCTCCAAGCCGCTGGTGGCCAAGTACAACGCCGCG     | 402  |
| PLM00134507+T7        | gtcctccttccatcgtcaacgaggtctccaagccgctgggtggccaagtacaacgcgcg    | 420  |
| PLM00134509+T7        | gtcctccttccatcgtcaacgaggtctccaagccgctgggtggccaagtacaacgcgcg    | 839  |
|                       | *****                                                          |      |
| PLM00134506+T7        | gagctcttgacgaagcgtgagatgggtctccaccacaaatccggttgcaagtgggaagcgt  | 696  |
| PLM00134505+T7        | gagctcttgacgaagcgtgagatgggtctccaccacaaatccggttgcaagtgggaagcgt  | 686  |
| XM_005854224.1:35-868 | GAGCTCTTGACGAAGCGTGAAGTGGTCTCCACCAAAATCCGCTTGCAAGTGGAGAAGCGT   | 462  |
| PLM00134507+T7        | gagctcttgacgaagcgtgagatgggtctccaccacaaatccggttgcaagtgggaagcgt  | 480  |
| PLM00134509+T7        | gagctcttgacgaagcgtgagatgggtctccaccacaaatccggttgcaagtgggaagcgt  | 899  |
|                       | *****                                                          |      |
| PLM00134506+T7        | gcgaaggagtttcggatcgtcctggacgagcgtgcgatcaccacttgaccttctcccg     | 756  |
| PLM00134505+T7        | gcgaaggagtttcggatcgtcctggacgagcgtgcgatcaccacttgaccttctcccg     | 746  |
| XM_005854224.1:35-868 | GCGAAGGAGTTTCGGATCGTCTGGACGACGTGTCGATCACCCTTGACCTTCTCCCG       | 522  |
| PLM00134507+T7        | gcgaaggagtttcggatcgtcctggacgagcgtgcgatcaccacttgaccttctcccg     | 540  |
| PLM00134509+T7        | gcgaaggagtttcggatcgtcctggacgagcgtgcgatcaccacttgaccttctcccg     | 959  |
|                       | *****                                                          |      |
| PLM00134506+T7        | gagtagcgaacgcggctcgaggccaagcaagtgtctcaacaggaagccgagcgcgcgaaa   | 816  |
| PLM00134505+T7        | gagtagcgaacgcggctcgaggccaagcaagtgtctcaacaggaagccgagcgcgcgaaa   | 806  |
| XM_005854224.1:35-868 | GAGTAGCGAACGCGGTTCGAGGCCAAGCAAGTGTCTCAACAGGAAGCCGACGCGCGAAA    | 582  |
| PLM00134507+T7        | gagtagcgaacgcggctcgaggccaagcaagtgtctcaacaggaagccgagcgcgcgaaa   | 600  |
| PLM00134509+T7        | gagtagcgaacgcggctcgaggccaagcaagtgtctcaacaggaagccgagcgcgcgaaa   | 1015 |
|                       | *****                                                          |      |
| PLM00134506+T7        | tatgtggaatgaaagcgaaccaagaaaaggaagccatcattatcaaaagcggaggagag    | 876  |
| PLM00134505+T7        | tatgtggaatgaaagcgaaccaagaaaaggaagccatcattatcaaaagcggaggagag    | 866  |
| XM_005854224.1:35-868 | TATGTGGAATGAAAGCGAACCAAGAAAAGGAAGCCATCATTTACAAAGCGGAGGGAGAG    | 642  |
| PLM00134507+T7        | tatgtggaatgaaagcgaaccaagaaaaggaagccatcattatcaaaagcggaggagag    | 660  |
| PLM00134509+T7        | tatgtggaatgaaagcgaaccaagaaaaggaagccatcattatcaaaagcggaggagag    | 1075 |
|                       | *****                                                          |      |
| PLM00134506+T7        | gcccaatccgctgctcgtggggtaaggccatcgagagaatcctgcttttatcaagctg     | 936  |
| PLM00134505+T7        | gcccaatccgctgctcgtggggtaaggccatcgagagaatcctgcttttatcaagctg     | 926  |
| XM_005854224.1:35-868 | GCCCAATCCGCTGCTCTGGTGGGTAAGGCCATTCGAGAGAATCTGCTTTTATCAAGCTG    | 702  |
| PLM00134507+T7        | gcccaatccgctgctcgtggggtaaggccatcgagagaatcctgcttttatcaagctg     | 720  |
| PLM00134509+T7        | gcccaatccgctgctcgtggggtaaggccatcgagagaatcctgcttttatcaagctg     | 1135 |
|                       | *****                                                          |      |
| PLM00134506+T7        | cgcaaaatcgacgcagccaggacattgcgaatgtcgtgtcctcttcgggtcagaaggtc    | 996  |
| PLM00134505+T7        | cgcaaaatcgacgcagccaggacattgcgaatgtcgtgtcctcttcgggtcagaaggtc    | 986  |
| XM_005854224.1:35-868 | CGCAAAATCGACGCAGCCAGGGACATTGCGAATGTCTGTCTCTTCGGTCAAGAAGTCT     | 762  |
| PLM00134507+T7        | cgcaaaatcgacgcagccaggacattgcgaatgtcgtgtcctcttcgggtcagaaggtc    | 780  |
| PLM00134509+T7        | cgcaaaatcgacgcagccaggacattgcgaatgtcgtgtcctcttcgggtcagaaggtc    | 1195 |
|                       | *****                                                          |      |
| PLM00134506+T7        | tatctgtctcgggactccctcttgtgaaatgtactcgggcgacgaagaagctctgga      | 1056 |
| PLM00134505+T7        | tatctgtctcgggactccctcttgtgaaatgtactcgggcgacgaagaagctctgga      | 1046 |
| XM_005854224.1:35-868 | TATCTGTCTCGGACTCCCTCTGTGAAATGTACTCGGCGACGAAGAAGTCTTGGGA        | 822  |
| PLM00134507+T7        | tatctgtctcgggactccctcttgtgaaatgtactcgggcgacgaagaagctctgga      | 840  |
| PLM00134509+T7        | tatctgtctcgggactccctcttgtgaaatgtactcgggcgacgaagaagctctgga      | 1255 |
|                       | *****                                                          |      |
| PLM00134506+T7        | aagaagcggtaggtcgacaagcttgcggccgcaactcgagcaccaccaccaccactga     | 1116 |
| PLM00134505+T7        | aagaagcggtaggtcgacaagcttgcggccgcaactcgagcaccaccaccaccactga     | 1106 |
| XM_005854224.1:35-868 | AAGAAGCGGTAG-----                                              | 834  |
| PLM00134507+T7        | aagaagcggtaggtcgacaagcttgcggccgcaactcgagcaccaccaccaccactga     | 900  |
| PLM00134509+T7        | aagaagcggtaggtcgacaagcttgcggccgcaactcgagcaccaccaccaccactga     | 1315 |
|                       | *****                                                          |      |

**Supplementary Figure S2. Comparative sequence between EWM26807(W7TL69) and EKU22077(K8YWQ7). CLUSTAL O (1.2.4) multiple sequence alignment of EWM26807(W7TL69) and EKU22077(K8YWQ7) (A) nucleotides sequences; and (B) amino acid sequences.**

**A.**

|                             |                                                                       |     |
|-----------------------------|-----------------------------------------------------------------------|-----|
| ENA   EKU22077   EKU22077.1 | -----                                                                 | 0   |
| ENA   EWM26807   EWM26807.1 | ATGAATGCAGCCAAGAAAGTTTGGCCGGAACCTGGGTAGCAAAATTCOCAAGGGTGCTGGC         | 60  |
| ENA   EKU22077   EKU22077.1 | -----ATGTCTCCAGCA                                                     | 12  |
| ENA   EWM26807   EWM26807.1 | ATGGGGGTGGCGGGGTGGCGGGGGTGGAGGGGGTGGCCCGGGGCATGTCTCCAGCA<br>*****     | 120 |
| ENA   EKU22077   EKU22077.1 | GGACCGCTGGGAGCCTTGTCTAGGTGTGACGGGCATCCTTTACGCGGGTACAATAGTTTT          | 72  |
| ENA   EWM26807   EWM26807.1 | GGACCGCTGGGAGCCTTGTCTAGGTGTGACGGGCATCCTTTACGCGGGTACAATAGTTTT<br>***** | 180 |
| ENA   EKU22077   EKU22077.1 | TACACGGTGGAGGGTGGCAACCGAGCTCTGTGTTCAACAGATTAATCGGTGTGAAAGAA           | 132 |
| ENA   EWM26807   EWM26807.1 | TACACGGTGGAGGGTGGCAACCGAGCTCTGTGTTCAACAGATTAATCGGTGTGAAAGAA<br>*****  | 240 |
| ENA   EKU22077   EKU22077.1 | GAAGTGTACATGGAGGGAATGCATTTTATGATTCCCTGGTTCGACATGCCATCATTTAC           | 192 |
| ENA   EWM26807   EWM26807.1 | GAAGTGTACATGGAGGGAATGCATTTTATGATTCCCTGGTTCGACATGCCATCATTTAC<br>*****  | 300 |
| ENA   EKU22077   EKU22077.1 | GACATCCGCCCAAGCCCGGATGATCCAGTCCCTTACAGGAAGCAAGACATGCAAATG             | 252 |
| ENA   EWM26807   EWM26807.1 | GACATCCGCCCAAGCCCGGATGATCCAGTCCCTTACAGGAAGCAAGACATGCAAATG<br>*****    | 360 |
| ENA   EKU22077   EKU22077.1 | GTCAACATCACCATCCGCGTTTGTCTAAGCCCGACTCGGCTCAACTCCGCTGGATCTTC           | 312 |
| ENA   EWM26807   EWM26807.1 | GTCAACATCACCATCCGCGTTTGTCTAAGCCCGACTCGGCTCAACTCCGCTGGATCTTC<br>*****  | 420 |
| ENA   EKU22077   EKU22077.1 | CGCACCTTGGGTCGCGACTACGACGAGCGTGTCTCCCTCCATCGTCAACGAGGTCCTCC           | 372 |
| ENA   EWM26807   EWM26807.1 | CGCACCTTGGGTCGCGACTACGACGAGCGTGTCTCCCTCCATCGTCAACGAGGTCCTCC<br>*****  | 480 |
| ENA   EKU22077   EKU22077.1 | AAGGCCGTGGTGGCCAAGTACAACGCCCGGAGCTCTTGACGAAGCGTGAGATGGTCTCC           | 432 |
| ENA   EWM26807   EWM26807.1 | AAGGCCGTGGTGGCCAAGTACAACGCCCGGAGCTCTTGACGAAGCGTGAGATGGTCTCC<br>*****  | 540 |
| ENA   EKU22077   EKU22077.1 | ACCCAAATCCGGTTGCGAGTTGGAGAAGCGTGGAAAGGAGTTTCGGATCGTCCGGACGAC          | 492 |
| ENA   EWM26807   EWM26807.1 | ACCCAAATCCGGTTGCGAGTTGGAGAAGCGTGGAAAGGAGTTTCGGATCGTCCGGACGAC<br>***** | 600 |
| ENA   EKU22077   EKU22077.1 | GTGTGATCACCCACTTACCTTCTCCCGGGAGTACACGAACCGGTCGAGGCCAAGCAA             | 552 |
| ENA   EWM26807   EWM26807.1 | GTGTGATCACCCACTTACCTTCTCCCGGGAGTACACGAACCGGTCGAGGCCAAGCAA<br>*****    | 660 |
| ENA   EKU22077   EKU22077.1 | GTGTCTCAACAGGAAGCCGAGCGCGCAAATATGTGGTAATGAAAGCGAACCAAGAAAAG           | 612 |
| ENA   EWM26807   EWM26807.1 | GTGTCTCAACAGGAAGCCGAGCGCGCAAATATGTGGTAATGAAAGCGAACCAAGAAAAG<br>*****  | 720 |
| ENA   EKU22077   EKU22077.1 | GAAGCCATCATATCAAAGCGGAGGGAGAGGCCAATCCGCTGCTCTGGTGGTAAAGGCC            | 672 |
| ENA   EWM26807   EWM26807.1 | GAAGCCATCATATCAAAGCGGAGGGAGAGGCCAATCCGCTGCTCTGGTGGTAAAGGCC<br>*****   | 780 |
| ENA   EKU22077   EKU22077.1 | ATTCGAGAGAATCCTGCTTTTATCAAGCTGCGCAAAATCGACGCGACGAGGACATTGCG           | 732 |
| ENA   EWM26807   EWM26807.1 | ATTCGAGAGAATCCTGCTTTTATCAAGCTGCGCAAAATCGACGCGACGAGGACATTGCG<br>*****  | 840 |
| ENA   EKU22077   EKU22077.1 | AATGTCGTGCTCTCTCGGGTCAGAAAGTCTATCTGTCTCGGACTCCCTCTTGTGAAT             | 792 |
| ENA   EWM26807   EWM26807.1 | AATGTCGTGCTCTCTCGGGTCAGAAAGTCTATCTGTCTCGGACTCCCTCTTGTGAAT<br>*****    | 900 |
| ENA   EKU22077   EKU22077.1 | ATGTACTCGGGCGACGAAGAGAAGTCTGGAAGAAGCGGTAG                             | 834 |
| ENA   EWM26807   EWM26807.1 | ATGTACTCGGGCGACGAAGAGAAGTCTGGAAGAAGCGGTAG                             | 942 |
|                             | *****                                                                 |     |

**B.**

|                            |                                                                           |     |
|----------------------------|---------------------------------------------------------------------------|-----|
| tr   K8YWQ7   K8YWQ7_NANGC | -----MSPAGPLGALLGVTGILYAGYNSF                                             | 24  |
| tr   W7TL69   W7TL69_9STRA | MNAARKFAENLQSKI PKGAGMGGGAGGGGGGPGGMS PAGPLGALLGVTGILYAGYNSF<br>*****     | 60  |
| tr   K8YWQ7   K8YWQ7_NANGC | YTVEGGHRALLFNRLIGVKEEVYMEGMHFMIPWFDMPIIYDIRPKPRMIQSLTGSKDMQM              | 84  |
| tr   W7TL69   W7TL69_9STRA | YTVEGGHRALLFNRLIGVKEEVYMEGMHFMIPWFDMPIIYDIRPKPRMIQSLTGSKDMQM<br>*****     | 120 |
| tr   K8YWQ7   K8YWQ7_NANGC | VNITIRVLSKPDQAQLRWIFRILGRDYDERVLPDIVNEVSKAVVAKYNAEELLTKREMSV              | 144 |
| tr   W7TL69   W7TL69_9STRA | VNITIRVLSKPDQAQLRWIFRILGRDYDERVLPDIVNEVSKAVVAKYNAEELLTKREMSV<br>*****     | 180 |
| tr   K8YWQ7   K8YWQ7_NANGC | TQIRLQLEKRAKEFRIVLDDVSI THLTF SREYTNAVEAKQVAQEAERAKYVVMKANQEK             | 204 |
| tr   W7TL69   W7TL69_9STRA | TQIRLQLEKRAKEFRIVLDDVSI THLTF SREYTNAVEAKQVAQEAERAKYVVMKANQEK<br>*****    | 240 |
| tr   K8YWQ7   K8YWQ7_NANGC | EAI I IKAEGEAQSAALVGKAIARENPAFIKLRKIDAARDIANVVS SSGQKVVLSADSLLLN          | 264 |
| tr   W7TL69   W7TL69_9STRA | EAI I IKAEGEAQSAALVGKAIARENPAFIKLRKIDAARDIANVVS SSGQKVVLSADSLLLN<br>***** | 300 |
| tr   K8YWQ7   K8YWQ7_NANGC | MYSGDEEKSGKKR                                                             | 277 |
| tr   W7TL69   W7TL69_9STRA | MYSGDEEKSGKKR                                                             | 313 |
|                            | *****                                                                     |     |

**Supplementary Figure S3. Amplification of UCA01 DNA.** Fragment of Prohibitin (834 bp) amplified by RT-PCR from *N. gaditana* RNA. Lane M: Molecular weight ladder; Lane 1, 2 and 3: Prohibitin fragment (NCBI Accession: XM\_005854224.1/UniProt Accession: K8YWQ7).

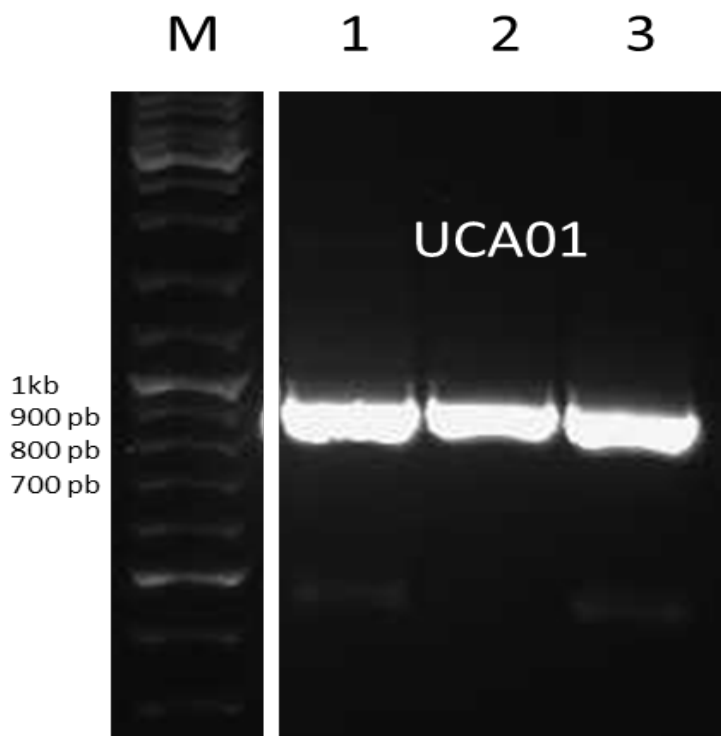

**Supplementary Figure S4. Expression of UCA01 in Rosetta gami.** 10% SDS-PAGE gel of *N. gaditana* UCA01 heterologous expression by *E. coli* Rosetta gami. Transformants of *E. coli* Rosetta gami with pET28a carrying *N. gaditana* prohibitin gene was cultured at 37°C for 2.5-3 hours in LB with (Induction of plasmid expression) or without IPTG (No induction of plasmid expression). After mechanical lysis of the cultures, the soluble fraction was analysed by SDS-PAGE. Lane M: Molecular weight ladder. Lane 1: Induction of recombinant protein expression with 1mM of IPTG. Lane 2: No induction of recombinant protein expression (without IPTG). SDS-PAGE gel was run at 200V for 45 min and stained with Coomassie blue.

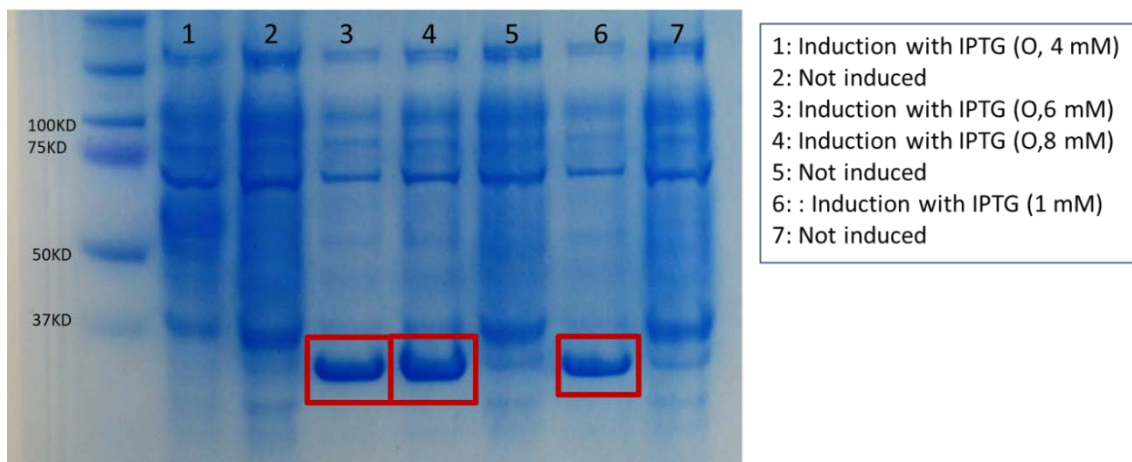

**Supplementary Figure S5. UCA01 Purification.** 10% SDS-PAGE gel of *N. gaditana* recombinant UCA01 purification. Induced culture of *E. coli* Rosseta gami expressing *N. gaditana* prohibitin gene was lysated and its soluble fraction was purified by metal ion affinity chromatography. The steps of the purification process were analysed by SDS-PAGE. Lane M: Molecular weight ladder. Lane A: No induced culture of transformant *E. coli* Rosseta gami (not purified fraction). Lane B: Induced culture of transformant *E. coli* Rosseta gami before purification. Lane C: load step of purification process using induced culture of transformant *E. coli* Rosseta gami. Lane D: Wash step of purification process using induced culture of transformant *E. coli* Rosseta gami. Lane E: First elution step of purification process using induced culture of transformant *E. coli* Rosseta gami. Lane F: Second elution step of purification process using induced culture of transformant *E. coli* Rosseta gami. SDS-PAGE gel was run at 200V for 45 min and stained with Coomassie blue.

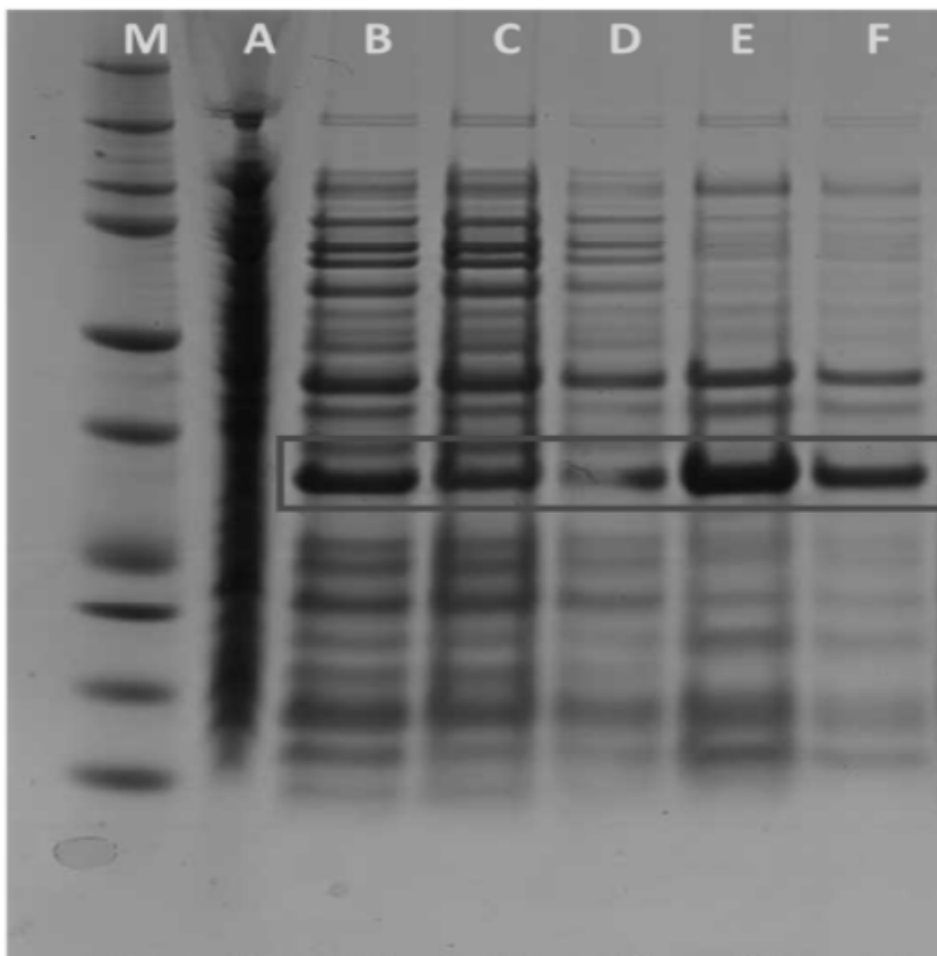

Supplement: ijms-22-00096-s001.pdf [file ijms-22-00096-s001.pdf]
